# Supplementary material for: Characterization of the Interaction of Neuropathy Target Esterase with the Endoplasmic Reticulum and Lipid Droplets
Source: PubMed Central journal article supplement (PMC6995513; doi:10.3390/biom9120848), 2019-12-09
Supplement: biomolecules-09-00848-s001.pdf [file biomolecules-09-00848-s001.pdf]

## Supplementary Materials

**Table S1.** Predicted transmembrane domains for neuropathy target esterase.

| Analysis software | Number of TMD | Location of TMD                        |
|-------------------|---------------|----------------------------------------|
| TMHMM             | 1             | 3-31                                   |
| TMpred            | 4             | 11-32,734-753,925-943,956-976          |
| SOSUI             | 1             | 10-32                                  |
| HMMTOP            | 1             | 9-32                                   |
| TopPred           | 5             | 12-32,733-753,922-942,956-976,999-1019 |

Figure S1.

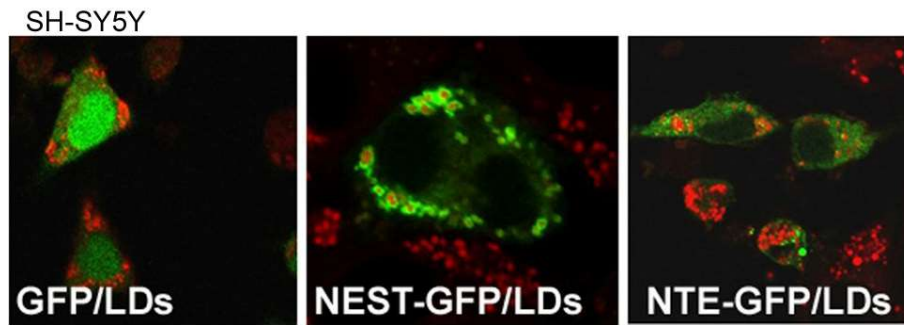

**Figure 1. NTE esterase domain (NEST), but not NTE localized to LDs in human neuroblastoma cells.** SH-SY5Y cells expressing GFP, NEST-GFP or NTE-GFP were treated with OA overnight. LDs were labeled by LipidTOX Red. Colocalization of GFP-fused proteins with LDs was visualized by confocal laser scanning microscopy. Figures are representative of three separate experiments.

Figure 2.

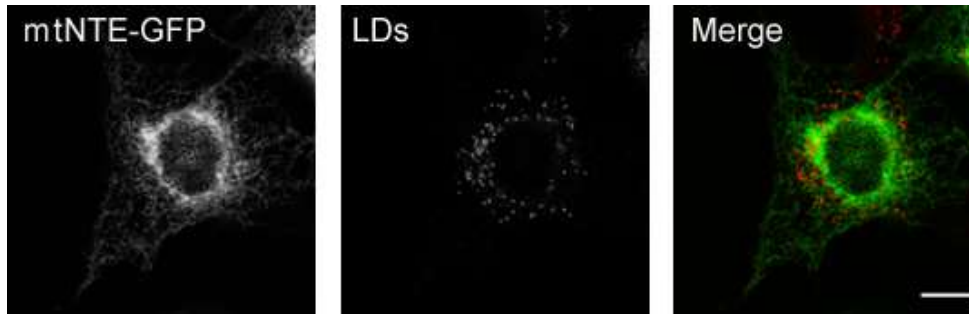

**Figure 2. NTE inactive mutant mtNTE did not localize to LDs.** COS-7 cells expressing mtNTE-GFP were incubated with OA overnight. LDs were labeled by LipidTOX Red. Colocalization of GFP-fused proteins with LDs was visualized by confocal laser scanning microscopy. Scale bar is 10  $\mu\text{m}$ . Figures are representative of three separate experiments.
